# Supplementary material
Source: HighWire-hosted journal article supplement (https://www.annfammed.org/highwire/filestream/27015/field_highwire_adjunct_files/0/Moschogianis_Supp_Apps1-3.pdf)
Supplement: Moschogianis_Supp_Apps1-3.pdf [file Moschogianis_Supp_Apps1-3.pdf]

## **Supplemental materials for**

Moschogianis S, Darley S, Coulson T, Peek N, Cheraghi-Sohi S, Brown BC. Seven opportunities for artificial intelligence in primary care electronic visits: qualitative study of staff and patient views. *Ann Fam Med*. 2025;23(3):214-222.

## **Supplemental Appendix 1: Description of the Patchs eVisit system using the TIDieR1 checklist**

### **Item 1: Brief name**

Patchs eVisit system.

### **Item 2: Rationale, theory or goal of the elements essential to the intervention**

EVisits enable patients to request help from their GP practice online, and the GP practice to decide how and who is best to respond, with the option to respond remotely via asynchronous messaging, telephone or video. OCSs aim to address the longstanding pressures on English primary care from increased patient demand and decreasing workforce capacity. They were a vital tool in helping GP practices cope with the COVID-19 pandemic - when all patients were dealt with remotely, if possible, to reduce spread of disease.

### **Item 3: Physical or informational materials used in the intervention, including those provided to participants or used in intervention delivery or in training of intervention providers**

- **Patchs website** <https://patchs.ai> where practice staff and patients can log in and use the system for responding to or submitting queries. There are also demonstration sites for both practice and patient groups.
- **Patchs video for patients** <https://youtu.be/rvqtjUWhDRw>
- **Seminar training:** Group sessions with Subject Matter Experts, delivered to administrative and clinical staff. Provides detailed guidance on eVisit use, best practice, likely impacts on practices, engagement with patients, and other important topics.
- **Training portal:** An eLearning platform provides clinical and non-clinical learning paths relevant to staff roles.
- **Online help:** A repository of information about functionality, best practice, how to guides, FAQs, and videos at <https://help.patchs.ai/>
- **Webinars:** Monthly webinars to demonstrate new functionality and best practice.
- **Support team:** A dedicated team (telephone and helpdesk) to help with technical problems.
- **Transformation success managers:** Dedicated members of staff to ensure practices use eVisits effectively.

### **Item 4: Procedures, activities, and/or processes used in the intervention, including any enabling or support activities**

#### *Patients*

Patients can access Patchs for themselves or for someone they care for via through the website of their GP practice to submit health queries or administrative requests. Patients register for Patchs (using name, date of birth, email address, gender, home address, telephone number) and create an account. Once registration is completed and verified by their GP practice, they are able to use Patchs to submit requests to their GP surgery via a 'chatbot'.

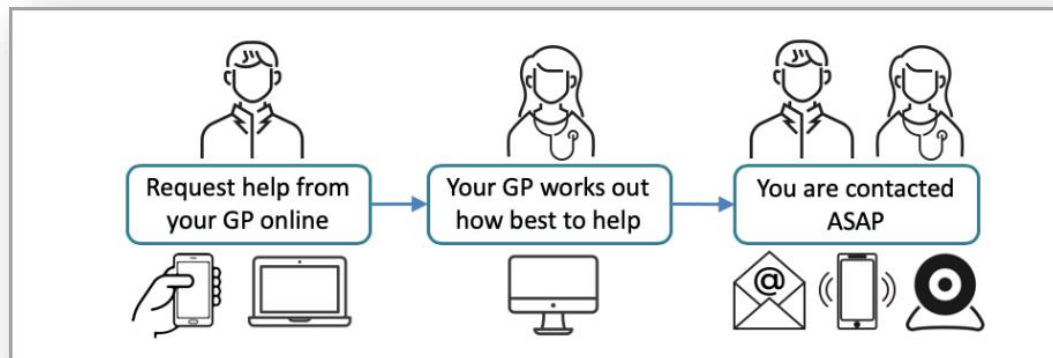

Patients select the type of request they want to submit and choose from five options: new health problem, ongoing health problem, admin request, medication request, or other.

← → ↻ 🏠 📄 https://patches.ai/demopractice/message/myself

patches High Street Medical Practice My Requests & Messages Make A Request My Video Consultations Give Feedback Help Demo ▾

How can we help you?

🔔 High Street Medical Practice is currently closed.

Change language ▾ [Help](#)

I have a...

- New health problem**  
Something I haven't contacted my GP practice about before
- Ongoing health problem**  
Something my GP practice already knows about
- Admin request**  
A form to fill out (e.g. a 'sick' or 'fit' note) or letter to write
- Medication request**  
Including repeats and one-offs
- Other**  
Something that doesn't fall into the above categories

[Back to start](#)

Copyright Spectra Analytics 2022 [Privacy](#)

Patients answer up to six fixed questions (how many depends on the type of query they are submitting) in a free-text box. Images and documents can be attached to queries if required. Chatbot questions cover topics that would be covered in a typical traditional primary care consultation and aim to emulate a natural conversation. For example, the health problem questions focus on description of symptoms, treatments tried so far, and ideas, concerns, and expectations e.g. What are your symptoms? What do you think may have caused them? Is there anything you are particularly worried about?

The screenshot shows a web browser window with the URL <https://patches.ai/demopractice/questions/474603>. The page header includes the 'patches' logo and navigation links: 'High Street Medical Practice', 'My Requests & Messages', 'Make A Request', 'My Video Consultations', 'Give Feedback', 'Help', and 'Demo'. The main heading is 'Make a request'. Below this is a 'Change language' dropdown menu and a 'Help' link. The form contains several sections: a blue box with the text 'I have a new health problem - something I haven't contacted my GP practice about before'; a purple box asking to 'Please describe your health problem:' with sub-questions 'What are your symptoms?', 'What do you think may have caused them?', and 'Is there anything you are particularly worried about?'; a blue box with the text 'I have a red itchy patch of skin on my leg - no idea what has caused it.' and an 'Edit' button; another purple box asking 'How long has the problem been going on?' with the sub-question 'Is it getting better, worse, or staying the same?'. At the bottom, there is a text input field with a '+' icon and the placeholder 'Type your reply here...'. Below the input field, it says '5 remaining. Reply to see next one.' and a 'Submit' button. A character count '0/1000' is also visible.

Prior to submitting their request, patients must confirm that the information they have entered is correct and that they agree for it to be added to their GP record. Once submitted, the transcript of their interaction with the Patches chatbot enters the Patches 'Unassigned' inbox for the GP surgery to process (see below). After submission, the patient sees a confirmation message in the web browser and in an email. It tells them what to expect next in terms of receiving contact from the GP practice, and what to do if they have not been contacted by the GP practice in a certain amount of time – this time period is set by the GP practice themselves.

## Thank you for contacting Test Practice, Mr Patient. Your request has been received.

Test Practice will respond as soon as possible during their opening hours: **9 to 5**.

They will respond either by:

- **Secure message** – please keep an eye on your **messages page** and email inbox (including **junk folder**).
- **Phone** – please keep your phone nearby. They may call from a withheld number.

The contact details they have for you are:

- **Email** – [patient@spectra.com](mailto:patient@spectra.com)
- **Phone** – 07821122568

[Update your contact details if they are incorrect.](#)

Please call Test Practice on: **07821122568** if:

- You have not heard from them in **48 working hours**, or
- Your **symptoms change**.

If you need help outside Test Practice's opening hours please call **111** or go to <https://111.nhs.uk>

Patients are invited to leave anonymised free text feedback comments and a star rating out of 5 after each time they interact with Patchs e.g. after submitting a request or respond to a message from their GP practice. They also receive an email after their request is resolved by their GP practice with a link to the feedback form. Patients indicate whether they agree to be contacted by the research team via email to be invited to an interview.

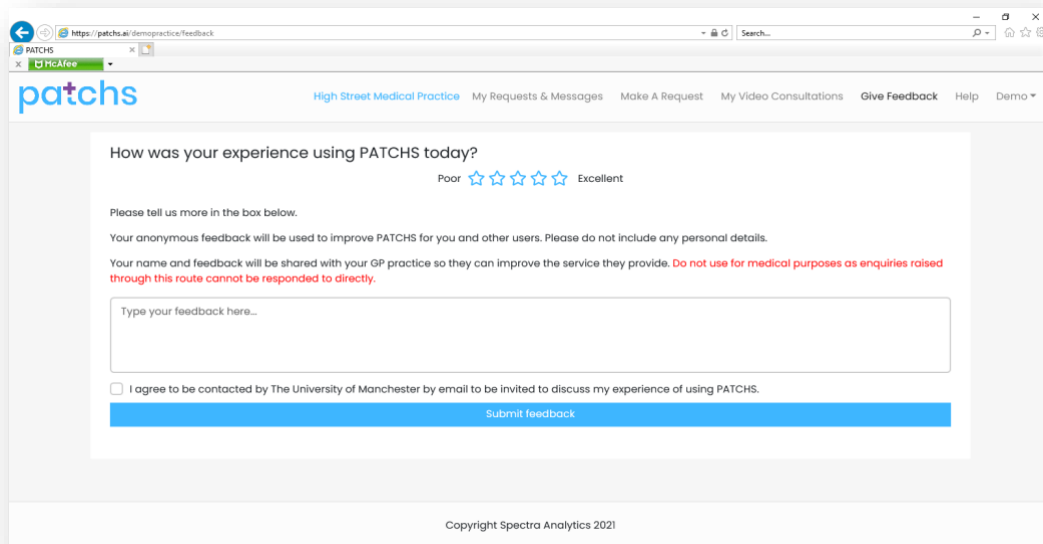

The screenshot shows a web browser window with the URL <https://patchs.ai/demopractice/feedback>. The page features the 'patchs' logo and a navigation bar with links: 'High Street Medical Practice', 'My Requests & Messages', 'Make A Request', 'My Video Consultations', 'Give Feedback', 'Help', and 'Demo'. The main content area is titled 'How was your experience using PATCHS today?' and includes a 5-star rating system with 'Poor' and 'Excellent' labels. Below the rating is a text box for feedback, a checkbox for consent to be contacted by The University of Manchester, and a blue 'Submit feedback' button. A copyright notice for Spectra Analytics 2021 is at the bottom.

How was your experience using PATCHS today?

Poor ☆☆☆☆☆ Excellent

Please tell us more in the box below.

Your anonymous feedback will be used to improve PATCHS for you and other users. Please do not include any personal details.

Your name and feedback will be shared with your GP practice so they can improve the service they provide. **Do not use for medical purposes as enquiries raised through this route cannot be responded to directly.**

Type your feedback here...

☐ I agree to be contacted by The University of Manchester by email to be invited to discuss my experience of using PATCHS.

Submit feedback

Copyright Spectra Analytics 2021

When patients register for Patchs they are informed their anonymised data may be shared with The University of Manchester for research purposes. Patients can opt out of sharing their anonymised data at any point using a toggle button in the Patchs system.

## Data Privacy

We take data privacy very seriously at PATCHS.

PATCHS is a product developed and maintained by [Spectra Analytics](#) and [Advanced](#). It is [approved by the NHS](#) which means it meets strict security and privacy standards including the NHS' [Data Security and Protection Toolkit](#) and [Cyber Essentials +](#).

We use your **anonymised** data to improve PATCHS - '**anonymised**' means you cannot be identified from it. This includes developing 'artificial intelligence' to support your GP practice to provide the care you need safely and quickly.

We may share your anonymised data with The University of Manchester for research purposes, and with other GPs for monitoring purposes, to make sure PATCHS is safe and delivering its intended benefits. At any time, you can change whether your anonymised data is shared with The University of Manchester for research purposes using the toggle below. This will not affect your ability to continue to use PATCHS to access GP services.

☒ Share my anonymised data with The University of Manchester for research purposes.

We do not sell your data and will never share your data without your consent.

If you would like your data to be deleted from PATCHS, please contact your GP practice.

To find out more about how your data is processed, please see the PATCHS [End User License Agreement](#)

### *GP practice staff*

Staff access Patchs in a web browser. Patient requests initially enter an 'Unassigned' inbox where nominated staff in the practice (usually reception staff) read all submissions and decide who is best to deal with each one (e.g. themselves, GP, nurse, pharmacist, or the patient themselves in self-care scenarios). If the request requires input from another member of staff in the practice (e.g. a GP or nurse), the receptionist will assign the query to their personal inbox in Patchs. Staff can mark requests as urgent or emergency with orange and red flags respectively to highlight them within the system to aid triage. Staff view the details of the patient query in the 'Chat history', and can respond via written message (within Patchs), telephone call, video call (within Patchs), or by arranging an in-person appointment. If patients are sent a secure message Patchs they receive an email or SMS notification with a link to read the message.

## My Inbox

☐ Out of Office [Help](#)

Show inbox for My Inbox (8) Today: 0 ▾

Search for patients by name - firstname followed by surname (press ENTER to search)...

CLEAR

Current inbox

All

Requests < Today (Tue) > <sup>8</sup>

Tasks

All

| DATE                                                                                               | STATUS                          | TYPE               | PATIENT                                                                                                                                                                                         |
|----------------------------------------------------------------------------------------------------|---------------------------------|--------------------|-------------------------------------------------------------------------------------------------------------------------------------------------------------------------------------------------|
|  20/12/2021 15:34 | Message sent                    | New health problem | Patient, Demo (39, F)     |
| I have a sore throat and am finding it difficult to swallow                                        |                                 |                    |                                                                                                                                                                                                 |
|  13/06/2022 10:25 | Review needed by you            | New health problem | Carters, Cally3 (29, F)   |
| I fell over playing football at the weekend and i have a swollen ankle                             |                                 |                    |                                                                                                                                                                                                 |
|  07/01/2022 14:57 | Review needed by you/VC for you | New health problem | Patient, Demo (39, F)     |
| I have a really bad cough, and can't sleep                                                         |                                 |                    |                                                                                                                                                                                                 |
|  27/05/2022 13:34 | Review needed by you            | New health problem | Carters, Cally3 (29, F)   |
| i fell in the garden and hurt my knee                                                              |                                 |                    |                                                                                                                                                                                                 |
|  16/06/2022 18:33 | Review needed by you            | Other              | Patient, Demo (39, F)     |
| Pre release                                                                                        |                                 |                    |                                                                                                                                                                                                 |
|  27/06/2022 19:01 | Review needed by you            | Other              | Patient, Demo (39, F)     |
| Testtest                                                                                           |                                 |                    |                                                                                                                                                                                                 |

Back to My Inbox (1) Today: 0

**THIS MESSAGE IS MARKED AS URGENT BY PATCHS AI**  
Change decision below if you disagree.

Mr Patient (31, M)

0782122568

**Message details**

Date submitted: 02/08/2022 16:42:17  
Status: Review needed by you  
Type: New health problem  
Submitted by: Patient  
Assigned to: Dr House  
Assigned for: 02/02/2022

**Patient Registration Status**

Registered

**Save status**

**Searching for patient in clinical system...**

**Try again**

**Assign Staff Member**

Assign today (Thu)

Select staff member...

**Add to staff member** **Unassign**

**Chat history**

Translate to English

Tue 2nd Aug 2022, 16:41

Mr Patient

I have heat rash

Tue 2nd Aug 2022, 16:41

PATCHS

How long has the problem been going on? Is it getting better, worse, or staying the same?

Tue 2nd Aug 2022, 16:41

Mr Patient

Worse

Tue 2nd Aug 2022, 16:41

PATCHS

What has been tried to make the problem better so far? Has it helped?

Tue 2nd Aug 2022, 16:41

**Pick message template**

**Add attachment** Hi Mr,

☐ Send as SMS to +44782122568

**Reply required** **Reply not required**

**Triage decision**

How clinically urgent is this message?

☐ Routine ☒ Urgent ☐ Emergency ☐ Admin / Med request

This urgency was chosen by PATCHS AI. Change it if you disagree.

What are the main topics of this message? (Optional)

Add another topic...

**Dermatology** **Headache**

These topics were chosen by PATCHS AI. Change them if you disagree.

**Ideally, who do you think should have dealt with this message?**

Choose...

What actions are required from you to resolve this message?

☐ Give patient information (e.g. advice)  
☐ Order tests (e.g. blood tests, X-ray)  
☐ Prescribe new medication  
☐ Re-authorise / Issue repeat medication  
☐ Make a referral (e.g. to a specialist)  
☐ Signpost to another service (e.g. A&P, physio)

☐ Fill out paperwork (e.g. Med 3, TWBC letter)  
☐ Telephone patient  
☐ Video call patient  
☐ See patient face-to-face  
☐ Visit patient at home  
☐ Mark as duplicate (e.g. if patient chasing)

**Patient not found in clinical system. Message cannot be saved. Email with attachment will be sent to clinical system on completion instead.**

Please use the "Try again" button under the "Patient Registration Status" section to reattempt matching the patient to your clinical system.

**Complete message**  
Message moves to Completed inbox

**Complete message & save to clinical system**  
Message moves to Completed inbox

Back to My Inbox (1) Today: 0

## Item 5: Description of the expertise, background and specific training given to intervention providers

Clinicians (e.g. GPs and nurses) and administrative staff with training provided as described in Item 3.

## Item 6: Modes of delivery (such as face to face or by some other mechanism, such as internet or telephone) of the intervention and whether it was provided individually or in a group

Patches is a web-based intervention. Patient users access Patches either via their GP website on a computer or smartphone. Practice staff access Patches via the website to process requests. Training for both staff and patients as described in Item 3 is delivered in groups.

## Item 7: Type(s) of location(s) where the intervention occurred, including any necessary infrastructure or relevant features

For GP practice staff the intervention typically occurs in their place of work, though staff can also use it from home. For patients the intervention takes place online, wherever they are based. As Patches is an online tool, necessary technical equipment such as a computer (or smartphone for patients) is required and an internet connection



**Item 8: Number of times the intervention was delivered and over what period of time including the number of sessions, their schedule, and their duration, intensity, or dose**

This study covers the period May 2020 – September 2021. Patchs was used on a daily basis by GP practices as part of their daily workflow in 51 practices. The most frequently submitted requests by patients were for new health problems (32.2%), followed by ongoing health problems (28.7%), medication requests (17.7%), admin requests (10.8%) and other (10.5%).

**Item 9: What, why, when, and how the intervention was planned to be personalised, titrated or adapted**

Practices could choose how to implement Patchs into their daily workflow – for example:

- If they used it for all incoming patient requests or if they offered it alongside other forms of access such as telephone and in-person.
- Which members of staff used the system.
- How they responded to patients e.g. via written message, telephone, video, or by arranging an in-person appointment.
- What the advertised response times patients should anticipate from them after they submitted a query (e.g. 48 working hours).
- How many queries patients could submit on a daily basis.
- Whether Patchs could be used solely for clinical or admin queries, or both.

Patients could choose whether or not to use Patchs, and what types of queries to use Patchs for.

**Item 10: What, why, when, and how the intervention was modified during the course of the study**

Patchs was updated throughout the study. Of relevance to this study were changes to the wording of chatbot questions based on feedback from patients and GP practice staff during interviews, to ensure they were more easily understood by patients and elicited the appropriate information.

**Item 11: How and by whom intervention adherence or fidelity was assessed, and any strategies that were used to maintain or improve adherence or fidelity**

Members of the Patchs team (not the research team) monitored usage by GP practices and uptake by patients. Where this was deemed to be low, additional training and support was offered as described in Item 3.

**Item 12: The extent to which the intervention was delivered as planned in terms of adherence and fidelity**

Other studies are quantitatively evaluating fidelity, which will be reported separately.

**References**

<sup>1</sup>Hoffmann TC, Glasziou PP, Boutron I, Milne R, Perera R, Moher D, et al. Better reporting of interventions: template for intervention description and replication (TIDieR) checklist and guide. BMJ. 2014;348:g1687. doi: 10.1136/bmj.g1687.

## **Supplemental Appendix 2: Interview and focus group topic guide**

All participants were given a study information leaflet and provided written or recorded verbal consent prior to their interview or focus group. Transcripts or notes were not shared with participants, however, a summary of what their interview or focus group discussed was provided at the end with opportunity for participants to add more or change anything they had said.

### **Introduction main points**

- Thank you - Purpose of interview is to explore thoughts and experiences of contacting your GP in general, using eVisits and how eVisits may develop in the future.
- Interview will last no longer than one hour but can be flexible around participant availability
- Check study information leaflet has been received in advance and understood. Any questions?
- Run through consent form and take written consent if face-to-face or verbal consent
- Switch on tape.

### **Opening questions:**

- **Practice Staff:** What role do you do within your GP practice? How long have you been doing it?
- **Patients:** How long have you been registered at ---- practice?

### **Initial AI questions:**

- Did you notice in the information sheet that the long term plan of [eVisit system] is to develop an automated feature using Artificial Intelligence (AI)?
- Can you describe what your initial thoughts are about that?
- Can I ask what you understand by 'AI' or what AI means to you - can you think of any examples of AI you are already using in every day life? How frequently do you think you encounter AI applications in your everyday life? How do you feel about using these AI applications? Do you generally feel positive or negative about the use of 'AI'?
- Do you have any thoughts around the use of AI in healthcare? (why do you think you feel that way? Compare and contrast with opinion on use in other areas of life – if different, why?)
- Do you have any thoughts around the use of AI in the eVisit system?
- We are interested to find out how you think eVisit system may use AI...In what way do you think AI might change your experience of using the eVisits? (What do they expect to see - e.g. do they think it will provide tailored questions/have a robot talking to them?)
- Thinking about the possible use of AI in eVisits... What aspects of eVisits do you feel could be automated? Is there anything you would like/not like to see automated?  
(Probes: possible uses might include: automated triage or responses for self-care)

### **Plain English explanation:**

*Machine Learning is a type of Artificial Intelligence (AI) computer algorithm that can 'learn' to do tasks we normally associate with human intelligence from examples they have been given i.e. they have not been programmed by a human to perform the tasks.*

*Examples include; Netflix recommending movies for you to watch based on your viewing history, Google being able to translate languages from text its analysed, and your email system identifying spam. AIs can handle more information than humans, have less variation, and may often be faster at these tasks. However, they are only as good as the examples they have learned from so can have problems such recommending you movies you don't like if someone's been using your Netflix account, Google being unable to translate a local dialect if it's not heard it before, and your email system marking a message from your friend as spam because they sent you a link to a video.*

- Have your feelings/thoughts about AI in eVisits changed after discussing the above? In what way?
- Can you think of any advantages to automation/AI in eVisits?
- Can you think of any disadvantages to automation/AI in eVisits?
- Would it make you more or less likely to use[eVisit system], or would it not affect your decision to use it?
- **Staff:** how do you think patients would respond to the thought of AI enhanced features in[eVisit system]? How do you think the use of AI might be best communicated to patients? (phrases to avoid/include, what to emphasise) etc? How would the introduction of AI compared to the introduction of eVisits in general? How do you think other staff may feel at the thought of AI in [eVisit system]?
- **Patients:** How do you think other patients might respond to the thought of AI enhanced features? How do you think practice staff may feel about the use of AI? Do you think they will have a similar opinion to you?
- Would you be interested/open to learning more about AI if you had the opportunity e.g. on data security? Would patient group involvement help embed at practice?

**Closing question:** *Summarise interview / focus group discussions:* Is there anything you'd like to add that we haven't covered regarding eVisits or AI?

This study was part of a larger project, whose protocol was registered on the Open Science Framework<sup>1</sup>.

### Research team: individuals conducting data collection

- Sarah Darley (PhD): Research Associate, University of Manchester (female)
- Susan Moschogianis (PhD): Research Associate, University of Manchester (female)
- Tessa Coulson (MD): General Practitioner (GP), Salford CCG (female)

All had PhD (SD and SM) and Masters (TC) level training in qualitative research methods. SD and SM had extensive experience of conducting qualitative data collection and analysis in health care settings.

### Participants:

Practices were approached to obtain variation in characteristics thought to impact their adoption of health technologies: Practice size (via number of registered patients), rurality, and levels of socio-economic deprivation. Fourteen practices were recruited in north-west England (n=11) and London (n=3) who were targeted to represent different geographical areas, patient population sizes, and levels of socioeconomic deprivation. All staff in these practices (n=14) were invited to participate in an interview either directly (via email) or indirectly (via research team's named contact at the practice). Recruitment however was purposeful to ensure staff with both clinical and non-clinical roles were included from all practices. Active recruitment stopped upon thematic saturation when themes were fully developed with clear definitions and no new information emerging after at least three interviews. Staff interviews took place between May 2020 and September 2021.

Patients using Patches were prompted by the eVisit system to leave anonymised feedback (of unlimited character count) at the end of each interaction with the system. This feedback was not analysed as part of this data set, and was used only to identify patients who were willing to be contacted by the research team. All patients submitting feedback were asked if they consented to be contacted by a member of the research team to take part in an interview about their experience and thoughts about eVisits. Invitations to participate, via email, were sent to a selection of these patients to ensure maximum diversity for factors that may influence eVisit experience and views on AI including; age, gender and ethnicity. Patients were recruited from a spread of GP practices (n=9) using the eVisit system, to include maximum variation on practice size, deprivation, location and ethnicity mix. In total 230 patients were invited to participate and 25 responded positively. interviews were conducted on all those who responded positively except 1 who was unable to finish the interview and was excluded prior to analysis. Patient interviews took place between May 2020 and September 2021.

Participants were aware of the research aims, and that the researchers were employed by The University of Manchester and were independent of the eVisit system developers. Interviews were transcribed by a professional company. Transcripts were not returned to participants following interview but a summary of what their interview had discussed was provided at the end of each interview with opportunity for participants to add more or change anything they had said.

### Focus groups:

Our initial topic guide and explanation of AI was based on our recent review of the eVisit literature<sup>2</sup> and refined based on feedback from a Patient and Public Involvement in Research Group (eight members). A more complex explanation of AI was simplified following discussion with the group, as participants reported it to be too complex and a barrier to meaningful discussion in the interviews. This meeting was held in June 2020, and was also used to test emerging findings from early interviews. A further focus group was conducted with in May 2021 with a different patient group (5 participants) to discuss and interpret the findings of the interviews. Discussions were led by SM whilst SD took detailed notes.

### Data analysis

Disagreements were resolved through discussion, with the wider study team consulted as necessary. Coders developed a coding framework, which was both emergent from the data (inductive) and guided by findings from our recent systematic review (deductive). Codes were refined during weekly meetings with the entire study team. Findings were triangulated between interviews and focus groups, and compared and contrasted between patients, staff and GP practices. Data analysis was conducted alongside interviews; both ceased at saturation when themes were fully developed with clear definitions, and no new information emerging after at least three interviews.

### References

<sup>1</sup> Darley S, Brown B. A multi-site process evaluation of online consultations and triage in English primary care 2020 [Available from: <https://osf.io/btrgy>]

<sup>2</sup> Darley S, Coulson T, Peek N, et al. Understanding How the Design and Implementation of Online Consultations Affect Primary Care Quality: Systematic Review of Evidence With Recommendations for Designers, Providers, and Researchers. *J Med Internet Res*. 2022/10/24 2022;24(10):e37436. doi:10.2196/37436

<sup>3</sup>Braun V, Clarke V. Using thematic analysis in psychology. *Qualitative research in psychology*. 2006;3(2):77-101. doi:10.1191/1478088706qp063oa
